# Supplementary material for: GPA peptide inhibits NLRP3 inflammasome activation to ameliorate colitis through AMPK pathway
Source: PubMed Central journal article supplement (PMC7585118; doi:10.18632/aging.103825), 2020-09-20
Supplement: aging-12-103825-s001..pdf [file aging-12-103825-s001..pdf]

## SUPPLEMENTARY TABLE

Supplementary Table 1. Primers used for RT-PCR analysis.

| Primer                   | Primer sequences (5' → 3')                       | Product size (bp) |
|--------------------------|--------------------------------------------------|-------------------|
| m-GAPDH                  | AACTTTGGCATTGTGGAAGG<br>GGATGCAGGGATGATGTTCT     | 132               |
| m-ZO-1                   | TCATCCCAAATAAGAACAGAGC<br>GAAGAACAACCCCTTCATAAGC | 198               |
| m-Occludin               | AAGCAAGTGAAGGGATCTGC<br>GGGGTTATGGTCCAAAGTCA     | 213               |
| h-GAPDH                  | TCACCAGGGCTGCTTTTAACT<br>GACAAGCTTCCCGTTCTCAG    | 152               |
| h-GPX-4                  | ACAAGAACGGCTGCGTGGTGAA<br>GCCACACACTTGTGGAGCTAGA | 100               |
| h-GCLM                   | TTGGAGTTGCACAGCTGGATT<br>TGGTTTTACCTGTGCCCACTG   | 200               |
| h-GCLC                   | GCTGTCTTGCAGGGAATGTT<br>ACACACCTTCCTTCCCATTG     | 160               |
| h-Nrf2                   | TCCAGTCAGAAACCAGTGGAT<br>GAATGTCTGCGCCAAAAGCTG   | 107               |
| h-18S ribosomal RNA      | ATCATGTTTGAGACCTTCAACA<br>CATCTCTTGCTCGAAGTCCA   | 318               |
| h-cytochrome c oxidase I | CAAACCTACGCCAAAATCCA<br>GAAATGAATGAGCCTACAGA     | 164               |
