# Supplementary material for: GPA peptide inhibits NLRP3 inflammasome activation to ameliorate colitis through AMPK pathway
Source: PubMed Central journal article supplement (PMC7585118; doi:10.18632/aging.103825), 2020-09-20
Supplement: aging-12-103825-s002..pdf [file aging-12-103825-s002..pdf]

**SUPPLEMENTARY FIGURES**

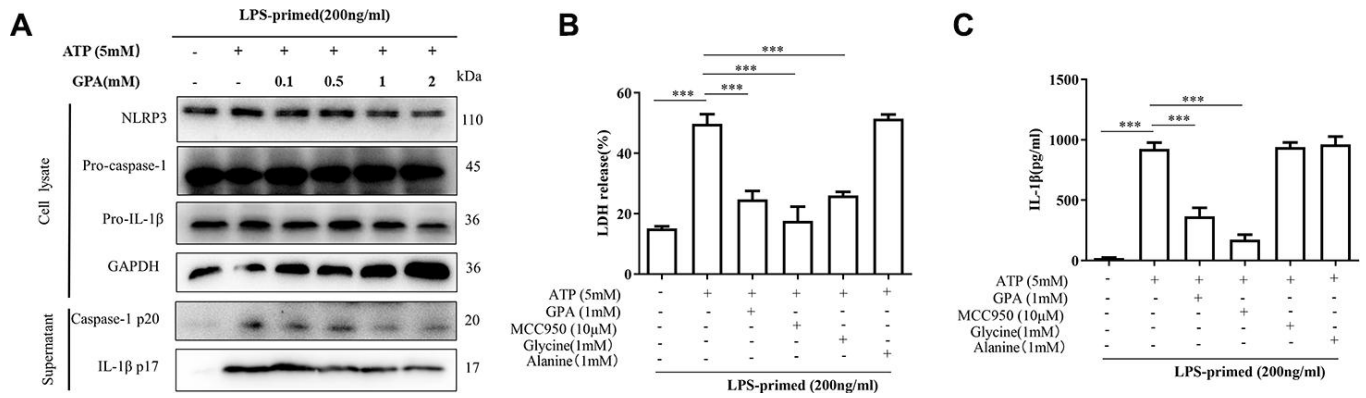

**Supplementary Figure 1. GPA inhibited canonical NLRP3 inflammasome activation in BMDMs.** BMDM cells were primed with LPS for 4 h, followed by GPA treatment 6 h before stimulation with ATP for 30 min. Immunoblot analyzed of IL-1β and caspase-1 in supernatants and cell lysate of BMDM cells (A). THP-1 cells were primed with LPS for 4 h, followed by GPA, MCC950, Glycine, and Alanine treatment 6 h before stimulation with ATP for 30 min. LDH and IL-1β in supernatants of THP-1 cells were detected (B, C). Data are presented as mean ± SD, three independent experiments. \**p* < 0.05, \*\**p* < 0.01 and \*\*\**p* < 0.001.

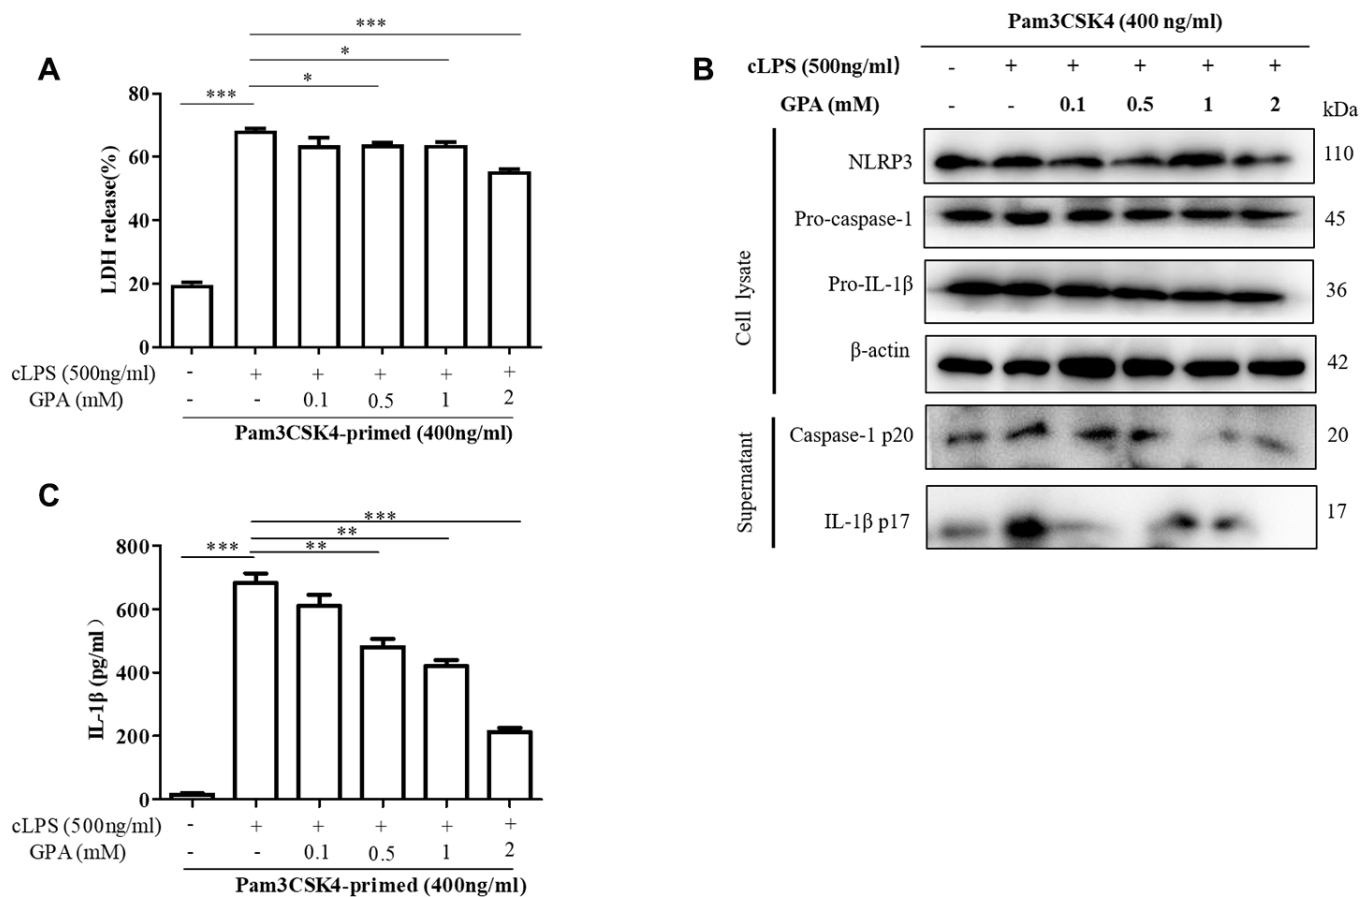

**Supplementary Figure 2. GPA inhibited and non-canonical NLRP3 inflammasome activation in THP-1 cells.** THP-1 cells were primed with Pam3CSK4 for 4 h, followed by GPA and cLPS treatment 16 h. Cell death was measured by and LDH released (**A**). Immunoblot analyzed of IL-1 $\beta$  and caspase-1 in supernatants and cell lysate of THP-1 cells (**B**). IL-1 $\beta$  in supernatants of THP-1 cells was detected by ELISA (**C**). Data are presented as mean  $\pm$  SD, three independent experiments. \*  $p < 0.05$ , \*\*  $p < 0.01$  and \*\*\*  $p < 0.001$ .

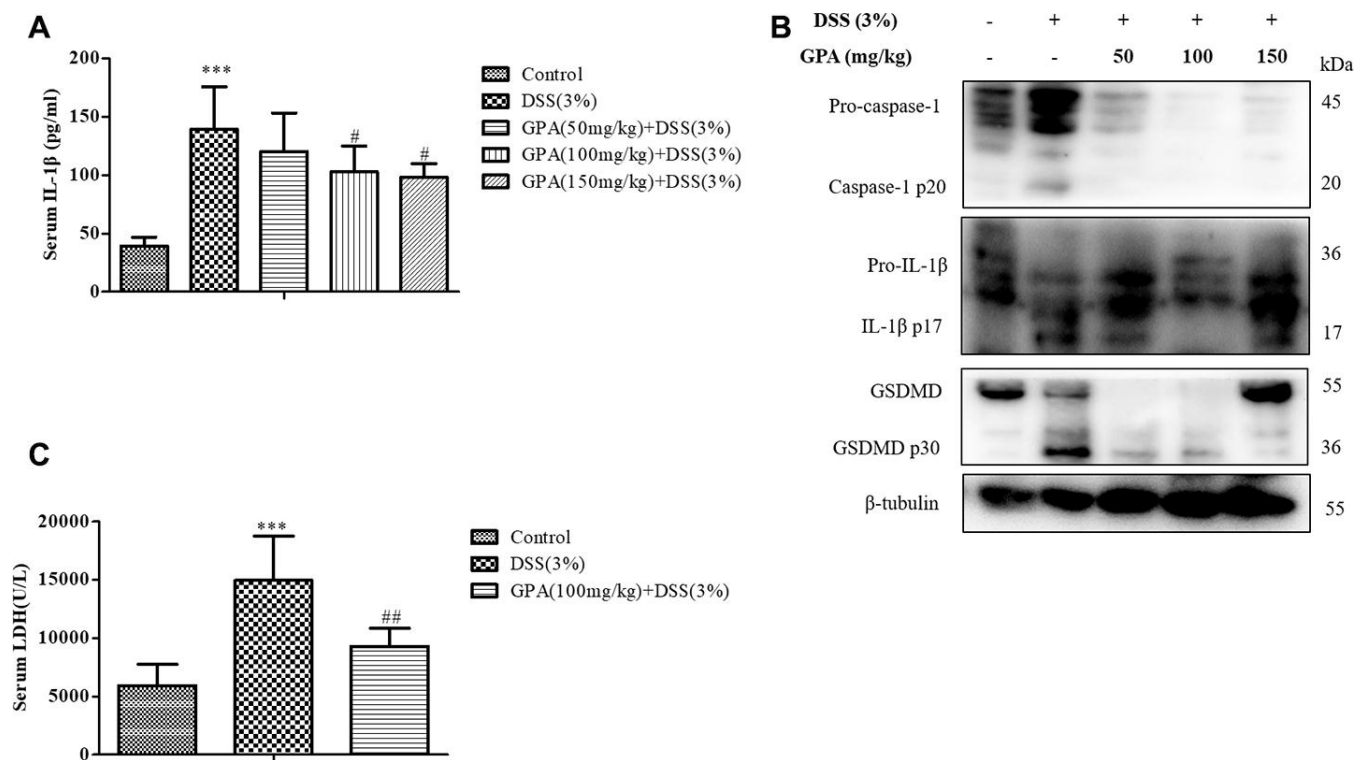

**Supplementary Figure 3. GPA alleviated DSS-induced colitis in mice.** IL-1β in serum of mice was detected by ELISA (A). Immunoblot analyzed of IL-1β, caspase-1 and GSDMD in colon tissues of mice (B). Cell death was measured by LDH released in serum (C). Data are presented as mean ± SD, n=6/group. \**p* < 0.05, \*\**p* < 0.01 and \*\*\**p* < 0.001.

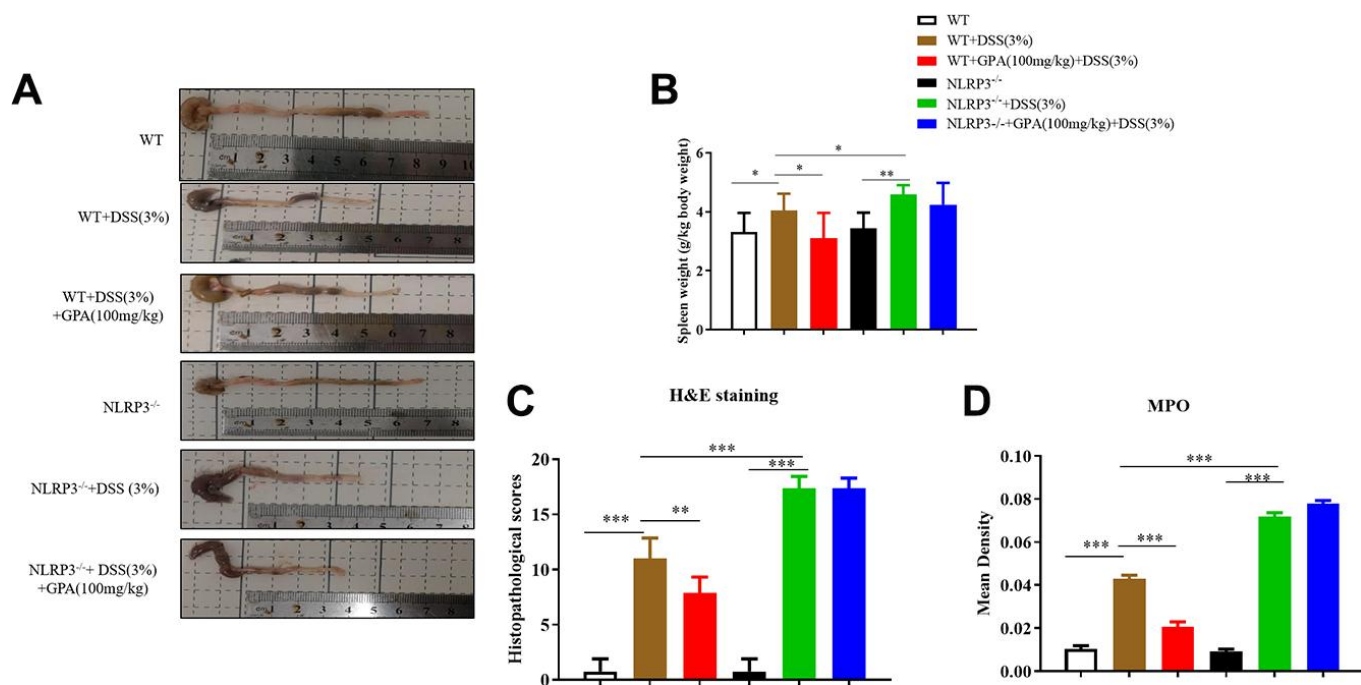

**Supplementary Figure 4. GPA alleviated colitis depended on NLRP3.** The lengths of colons from each group of mice (A). Spleen weights were measured (B). Analysis of histopathological scores in colon tissues by HE staining (C). Analysis of mean density of MPO in colon tissues by IHC (D). Data are presented as mean ± SD, n=10 /group. \**p* < 0.05, \*\**p* < 0.01 and \*\*\**p* < 0.001.

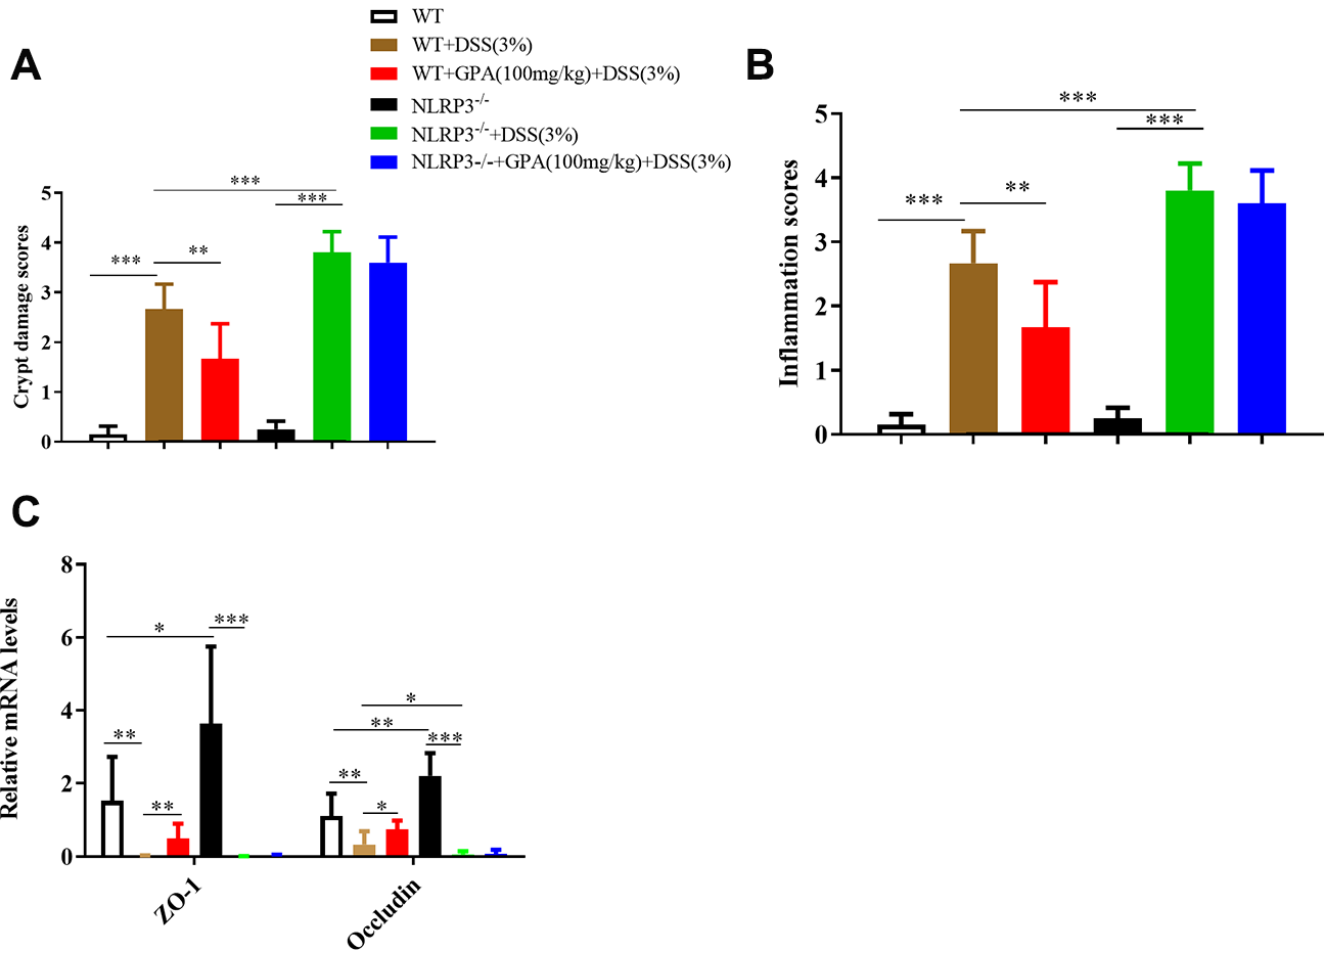

**Supplementary Figure 5. GPA alleviated inflammation and maintained tight junction depended on NLRP3.** Crypt damage and inflammation in colon tissues were evaluated by H&E stains (A, B). ZO-1 and Occludin mRNA levels in the colon tissues were measured by quantitative real-time PCR (C). Data are presented as mean  $\pm$  SD, n=10 /group. \* $p$  < 0.05, \*\* $p$  < 0.01 and \*\*\* $p$  < 0.001.

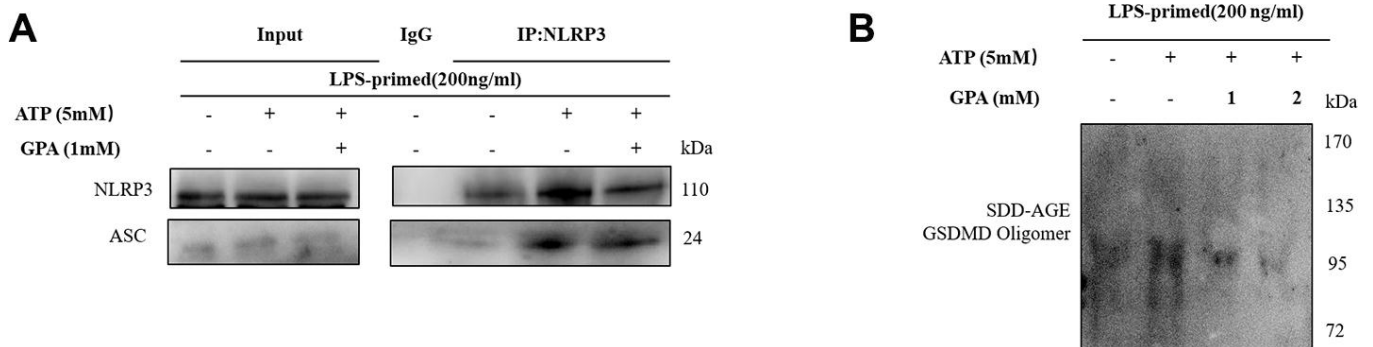

**Supplementary Figure 6. GPA inhibited NLRP3 interaction with ASC, and oligomerization of GSDMD.** THP-1 cells were primed with LPS for 4 h, followed by GPA treatment 6 h before stimulation with ATP for 30 min. IP and immunoblot analyzed of the interaction of endogenous NLRP3 and ASC in THP-1 cells (A). Immunoblot analyzed of GSDMD by SDD-AGE assay in THP-1 cells (B). Three independent experiments.

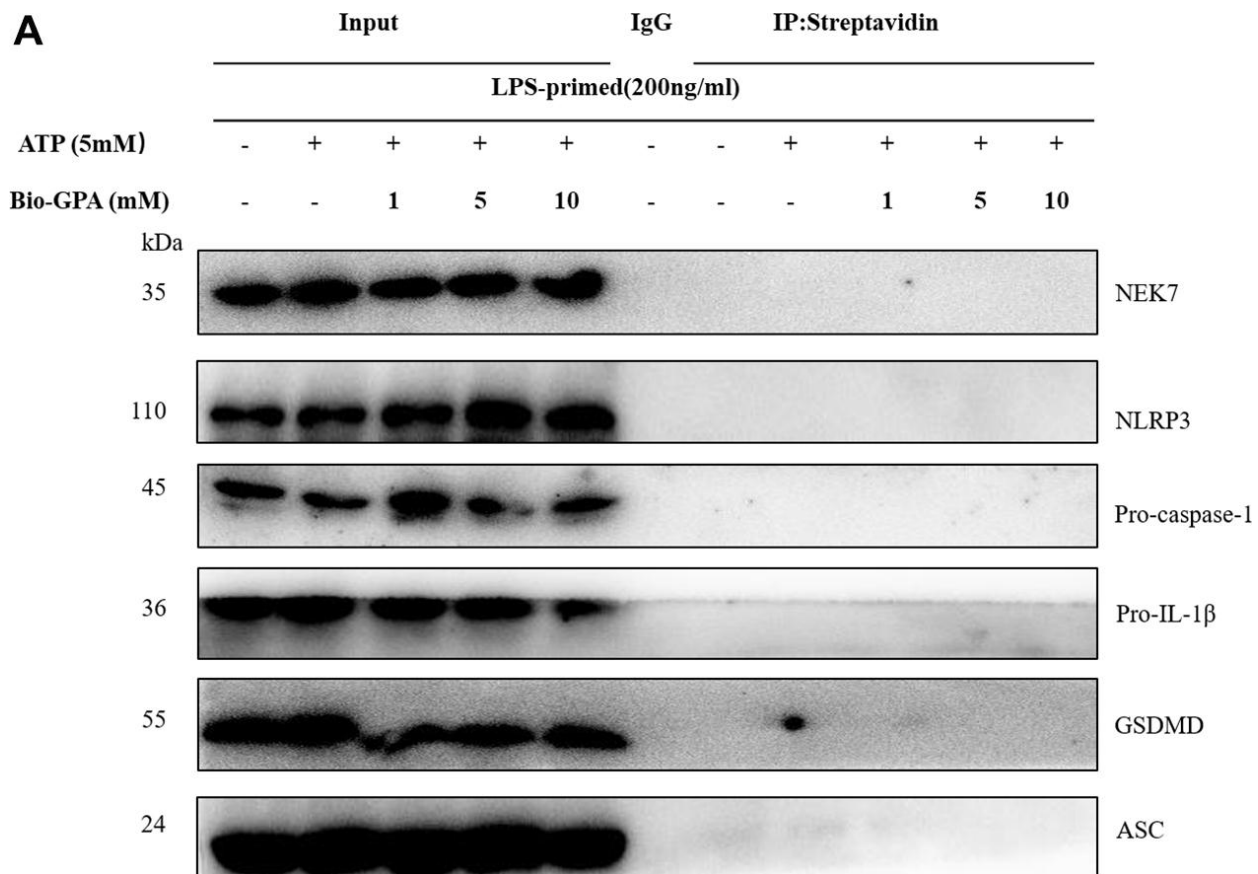

**Supplementary Figure 7. Effect of GPA interaction with protein about NLRP3.** THP-1 cells were primed with LPS for 4 h, followed by GPA treatment 6 h before stimulation with ATP for 30 min. Pull-down and immunoblot analyzed of the interaction of GPA and NLRP3 inflammasome in THP-1 cells (A). Three independent experiments.

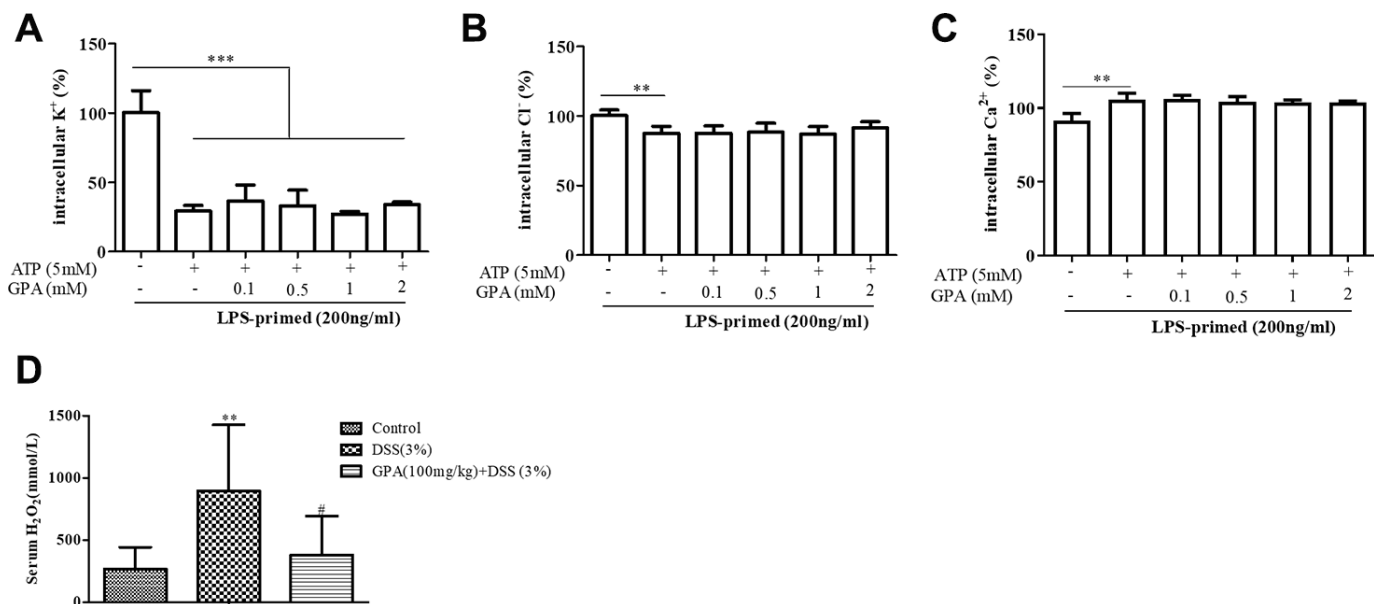

**Supplementary Figure 8. Effect of GPA on cell signals about NLRP3 inflammasome activation.** Levels of the K<sup>+</sup>, Cl<sup>-</sup> and Ca<sup>2+</sup> were measured in THP-1 cells (A–C). Data are presented as mean ± SD, three independent experiments. \* *p* < 0.05, \*\* *p* < 0.01 and \*\*\* *p* < 0.001. Oxidative stress was detected by level of H<sub>2</sub>O<sub>2</sub> in serum (D). Data are presented as mean ± SD, n=12/group. \* *p* < 0.05, \*\* *p* < 0.01 and \*\*\* *p* < 0.001.

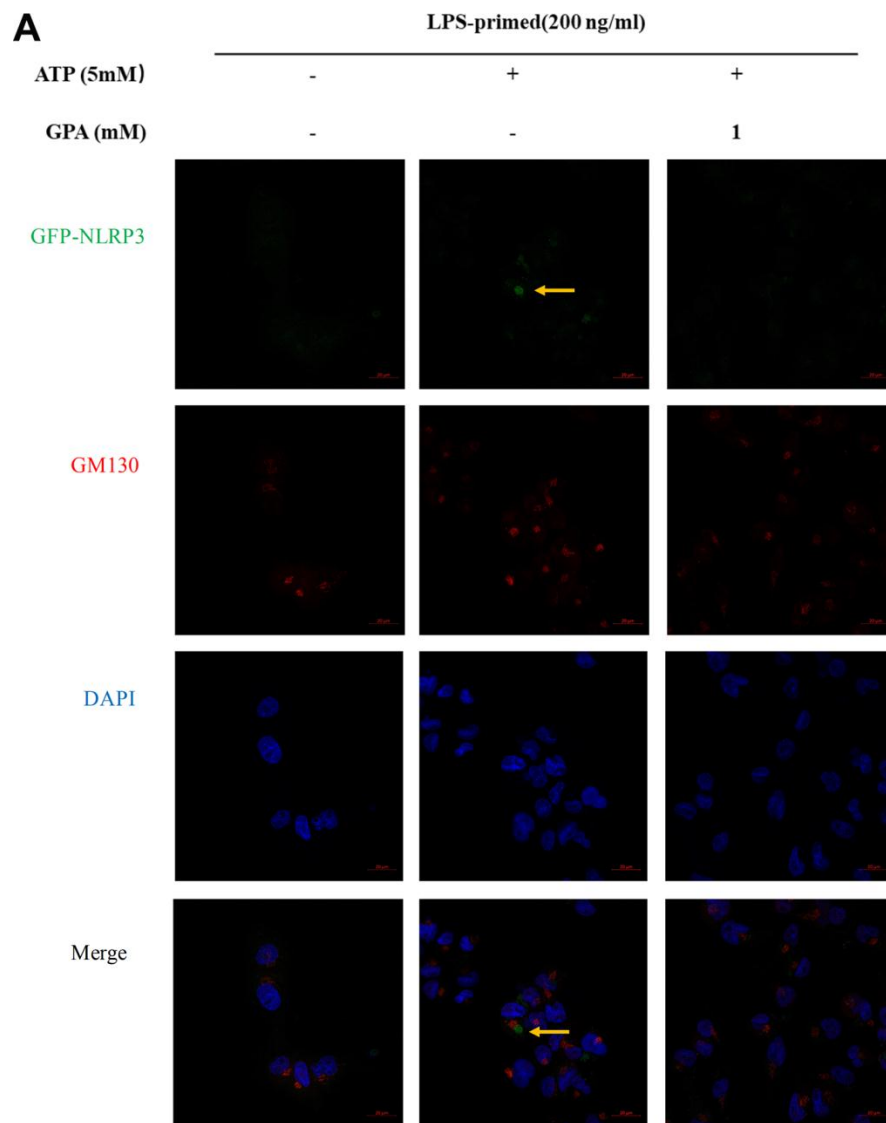

**Supplementary Figure 9. Effect of GPA on NLRP3 Golgi localization.** Immunofluorescence analyzed of Golgi components of NLRP3 in THP-1 cells (A). Three independent experiments.

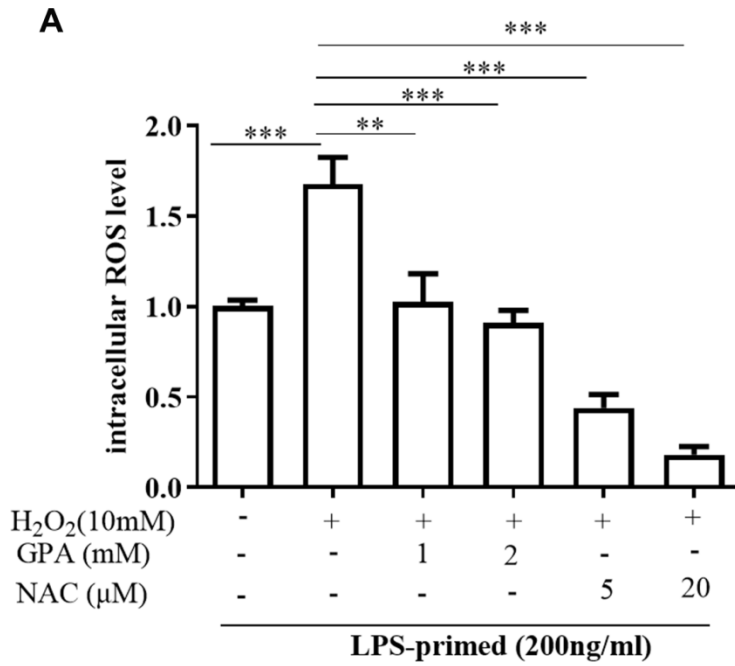

**Supplementary Figure 10. GPA suppressed H<sub>2</sub>O<sub>2</sub>-induced ROS production.** THP-1 cells were primed with LPS for 4h, followed by GPA or NAC treatment 6 h before stimulation with H<sub>2</sub>O<sub>2</sub> for 4 h. Levels of the ROS was measured in THP-1 cells (A). Data are presented as mean ± SD, three independent experiments. \**p* < 0.05, \*\**p* < 0.01 and \*\*\**p* < 0.001.

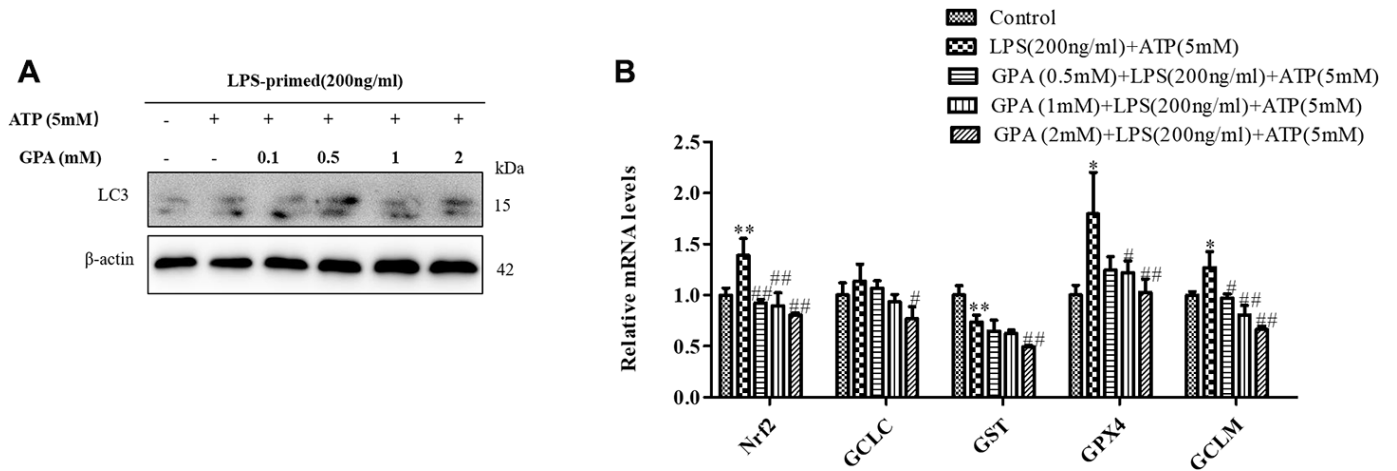

**Supplementary Figure 11. Effect of GPA on autophagy and Nrf2.** THP-1 cells were primed with LPS for 4 h, followed by GPA treatment 6 h before stimulation with ATP for 30 min. Immunoblot analyzed of LC3 in cell lysate of THP-1 cells (A). Nrf2, GCLC, GPX4 and GCLM mRNA levels in were measured by quantitative real-time PCR (B). Data are presented as mean ± SD, three independent experiments. \**p* < 0.05, \*\**p* < 0.01 and \*\*\**p* < 0.001.
